# Supplementary material for: Catenane formation of a cyclic poly(alkyl sorbate) via chain-growth polymerization induced by an N-heterocyclic carbene and ring-closing without extreme dilution
Source: Royal Society of Chemistry journal article supplement (doi:10.1039/d3ra01614e), 2023-01-01
Supplement: d3ra01614e1.pdf [file d3ra01614e1.pdf]

# Catenane Formation of a Cyclic Poly(alkyl sorbate) via Chain-Growth Polymerization Induced by an *N*-Heterocyclic Carbene and Ring-Closing Without Extreme Dilution

Hirotake Yato, Kota Oto, Akinori Takasu\*, Masahiro Higuchi

*Division of Soft Materials,*

*Department of Engineering, Nagoya Institute of Technology,*

*Gokiso-cho, Showa-ku, Nagoya 466-8555, Japan*

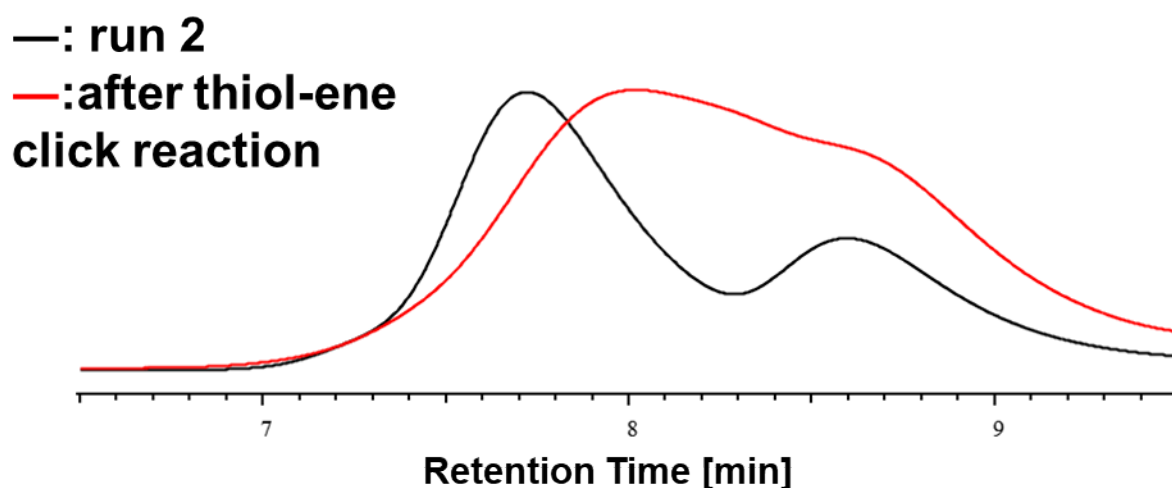

**Figure S1.** SEC traces of poly(ES) after thiol-ene click reaction (Thiol- ene click reaction with 1-dodecanethiol in Experimental Section).

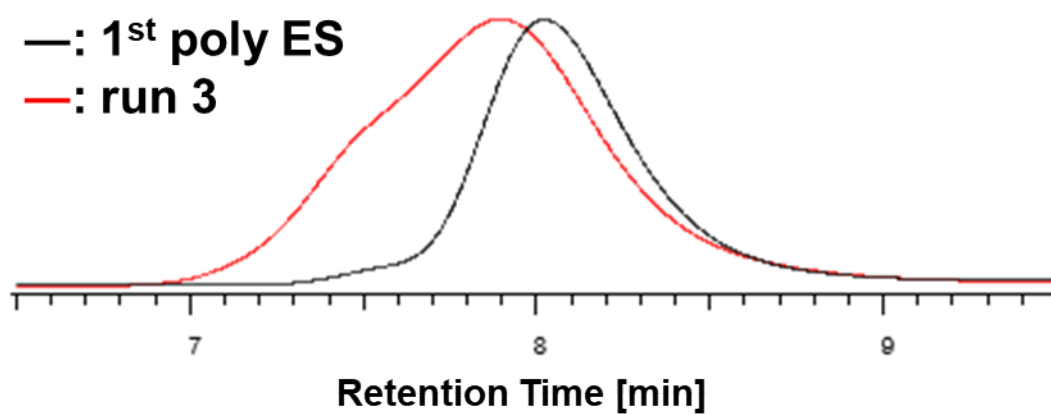

Figure S2. SEC traces of poly(ES) (Run 3 in Table 1).

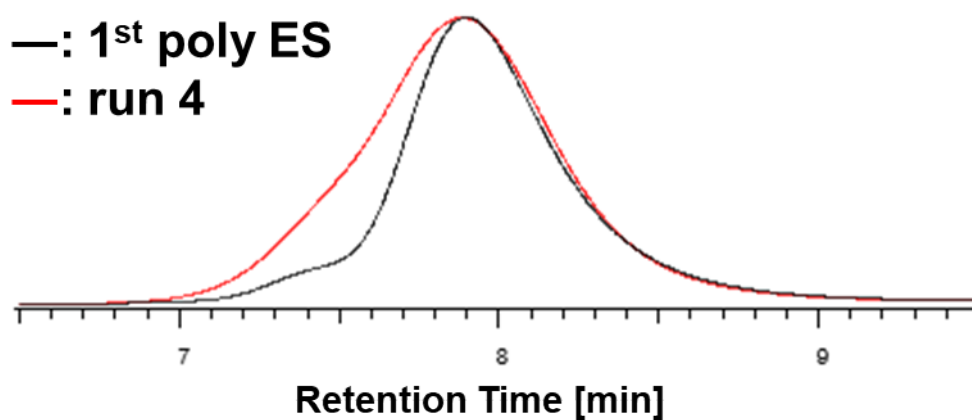

Figure S3. SEC traces of poly(ES) (Run 4 in Table 1).

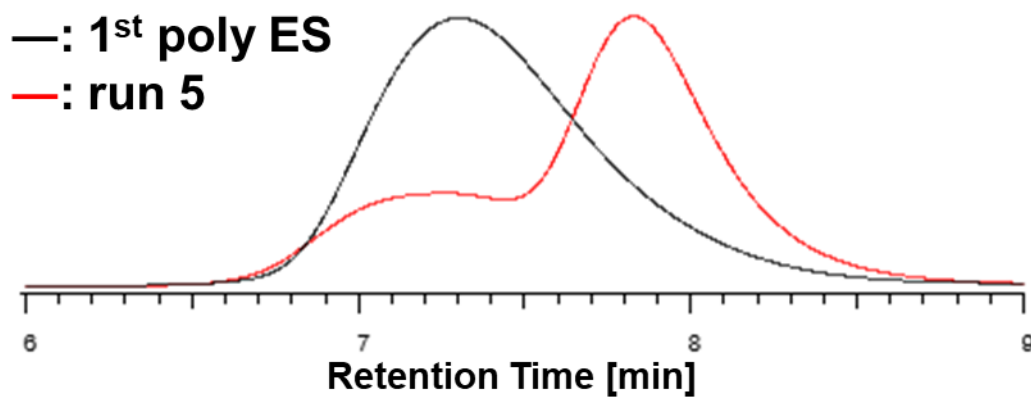

Figure S4. SEC traces of poly(ES) (Run 5 in Table 1).

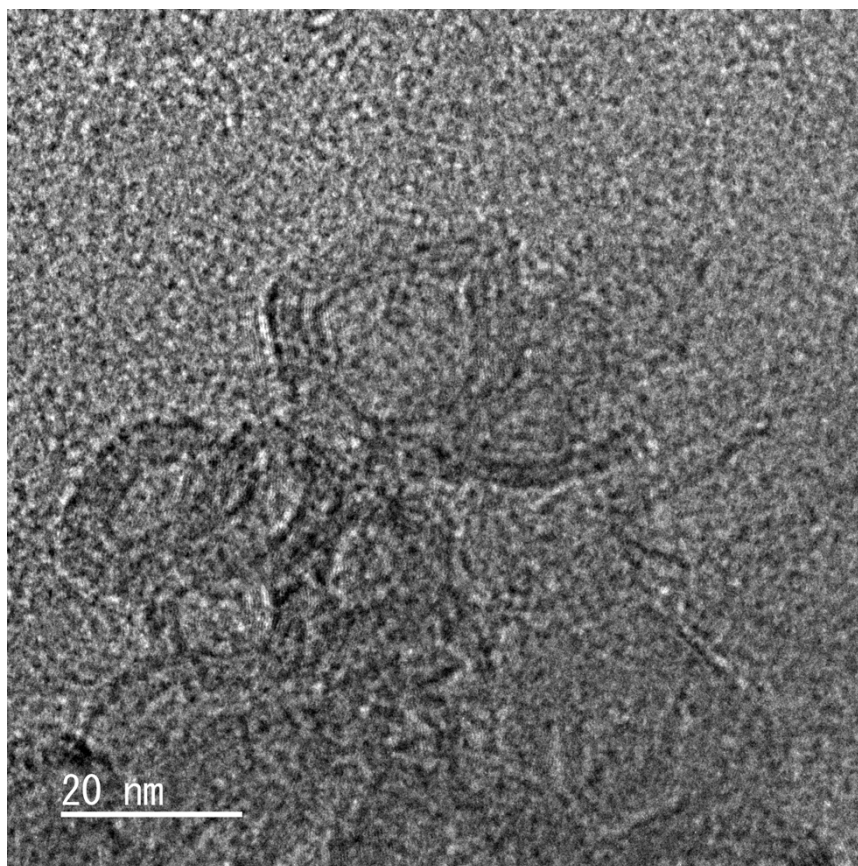

**Figure S5.** TEM observation of catenanes (Run 3 in Table 1).

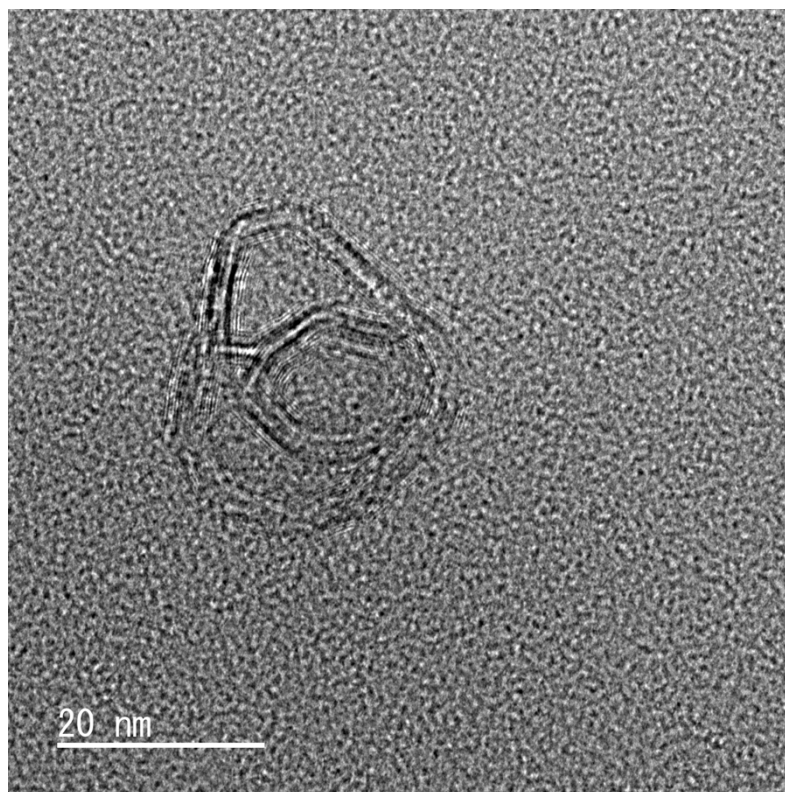

**Figure S6.** TEM observation of catenanes (Run 5 in Table 1).

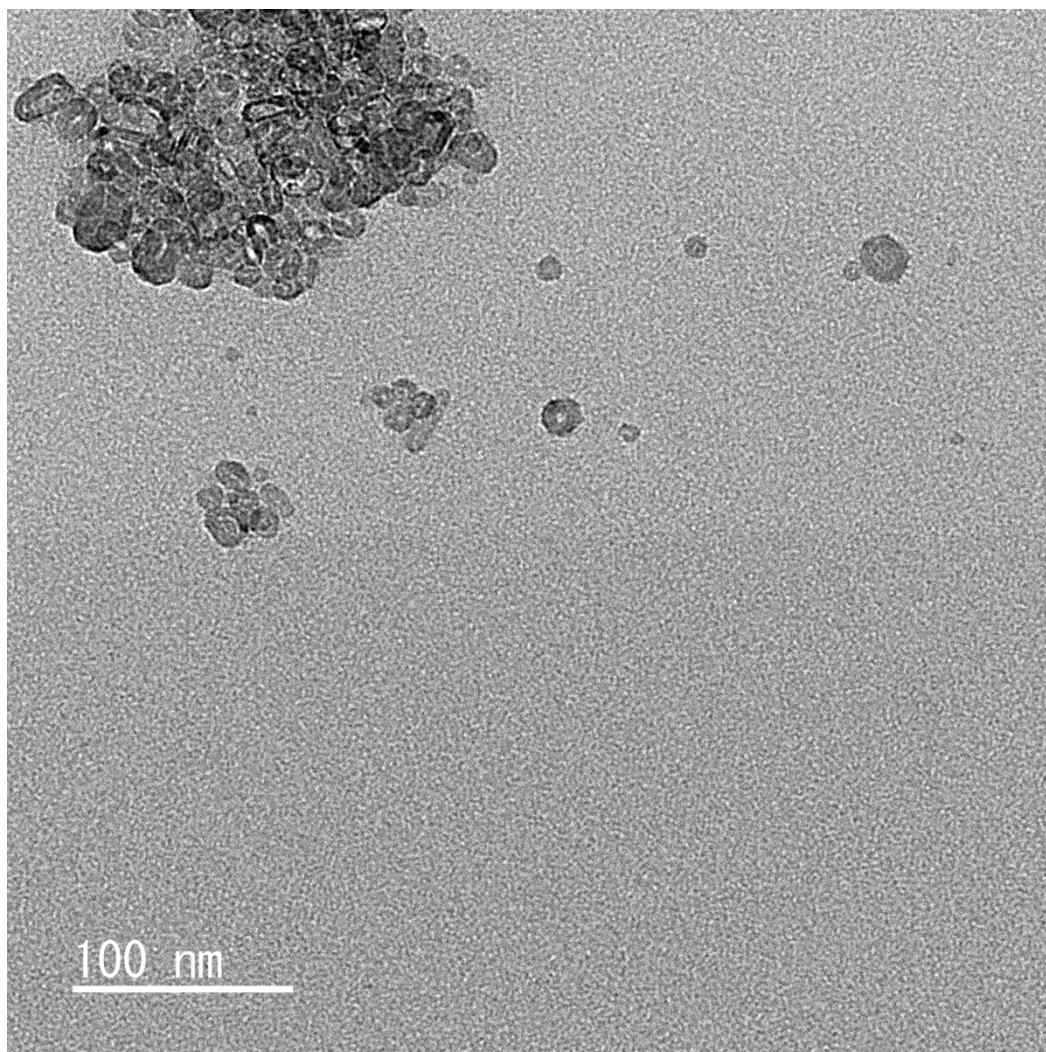

**Figure S7.** The TEM image taken in the overall view (Run 1 in Table 1).
